# Supplementary material
Source: PubMed Central journal article supplement (PMC4754085)
Supplement: NIHMS755000-supplement-supplement_1.pdf [file NIHMS755000-supplement-supplement_1.pdf]

## Supplementary Online Content

Pursnani A, Massaro JM, D'Agostino RB, O'Donnel CJ, Hoffmann U. Guideline-based statin eligibility, coronary artery calcification, and cardiovascular events. *JAMA*. doi:10.1001/jama.2015.7515

**eTable 1.** Identification of Incident CVD by Statin Eligibility (Excluding Subjects With Diabetes Mellitus and Those With LDL>190): Observed Event Rates and Hazards Ratios Stratified by Statin Allocation Recommendation According to 2004 ATP III Versus 2013 ACC/AHA Guidelines

**eTable 2.** Identification of Incident CVD by Statin Eligibility (Stratified by Offspring Cohort and 3rd Generation Cohort): Observed Event Rates and Hazards Ratios Stratified by Statin Allocation Recommendation According to 2004 ATP III Versus 2013 ACC/AHA Guidelines

**eTable 3.** Baseline Characteristics of Intermediate Risk Subgroup (FRS 6%-20%)

**eTable 4.** Identification of Incident CVD by Statin Eligibility With CAC=0 Becoming Ineligible for Statin Criterion

**eTable 5.** Identification of Incident CVD by Statin Eligibility (Excluding Participants With Incomplete History Regarding Family History of Premature CHD): Observed Event Rates and Hazards Ratios Stratified by Statin Allocation Recommendation According to 2004 ATP III Versus 2013 ACC/AHA Guidelines

This supplementary material has been provided by the authors to give readers additional information about their work.

**eTable 1.** Identification of Incident CVD by Statin Eligibility (Excluding Subjects With Diabetes Mellitus and Those With LDL>190): Observed Event Rates and Hazards Ratios Stratified by Statin Allocation Recommendation According to 2004 ATP III Versus 2013 ACC/AHA Guidelines

|                 | Endpoint                           | Incident CVD                                            |                          |                |
|-----------------|------------------------------------|---------------------------------------------------------|--------------------------|----------------|
|                 | <b>N events/<br/>Sample Size</b>   | 64/2291 (2.8%)                                          |                          |                |
|                 | <b>Median<br/>Years F/up (IQR)</b> | 9.4 yrs (8.1-10.1)                                      |                          |                |
|                 |                                    | <b>N events/<br/>Sample Size</b>                        | <b>HR<br/>(95% CI)</b>   | <b>P value</b> |
| <b>2004 ATP</b> | <b>Statin-eligible</b>             | <b>7.4%</b><br>(17/231)                                 | <b>3.5</b><br>(2.0-6.0)  | <.001          |
|                 | <b>Not Statin-eligible</b>         | <b>2.3%</b><br>(47/2060)                                | Ref                      | --             |
| <b>2013ACC</b>  | <b>Statin-eligible</b>             | <b>6.1%</b><br>49/799                                   | <b>6.6</b><br>(3.7-11.7) | <.001          |
|                 | <b>Not Statin-eligible</b>         | <b>1.0%</b><br>15/1492                                  | Ref                      | --             |
|                 |                                    | <b>P-value (HR<sub>2004</sub> vs HR<sub>2013</sub>)</b> |                          | <.004          |

**eTable 2.** Identification of Incident CVD by Statin Eligibility (Stratified by Offspring Cohort and 3<sup>rd</sup> Generation Cohort): Observed Event Rates and Hazards Ratios Stratified by Statin Allocation Recommendation According to 2004 ATP III Versus 2013 ACC/AHA Guidelines

|                 | Endpoint                               | Incident CVD - Offspring                                    |                              |                    | Incident CVD - 3 <sup>rd</sup> Generation                   |                         |                    |
|-----------------|----------------------------------------|-------------------------------------------------------------|------------------------------|--------------------|-------------------------------------------------------------|-------------------------|--------------------|
|                 | <b>N events/<br/>Sample<br/>Size</b>   | 48/982 (4.9%)                                               |                              |                    | 26/1453 (1.8%)                                              |                         |                    |
|                 | <b>Median<br/>Years F/up<br/>(IQR)</b> | 9.1 yrs (8.0-10.1)                                          |                              |                    | 9.6 yrs (8.2-10.2)                                          |                         |                    |
|                 |                                        | <b>N events/<br/>Sample<br/>Size</b>                        | <b>HR<br/>(95% CI)</b>       | <b>P<br/>value</b> | <b>N events/<br/>Sample<br/>Size</b>                        | <b>HR<br/>(95% CI)</b>  | <b>P<br/>value</b> |
| <b>2004 ATP</b> | <b>Statin-<br/>eligible</b>            | <b>8.6%</b><br>(18/209)                                     | <b>2.3</b><br>(1.3-4.2)      | .005               | <b>4.3%</b><br>(6/139)                                      | <b>3.0</b><br>(1.2-7.6) | .017               |
|                 | <b>Not Statin-<br/>eligible</b>        | <b>3.9%</b><br>(30/773)                                     | Ref                          | --                 | <b>1.5%</b><br>(20/1314)                                    | Ref                     |                    |
| <b>2013ACC</b>  | <b>Statin-<br/>eligible</b>            | <b>7.6%</b><br>44/576                                       | <b>8.4</b><br>(3.0-<br>23.3) | <.001              | <b>4.1%</b><br>(15/365)                                     | <b>4.3</b><br>(2.0-9.4) | <.001              |
|                 | <b>Not Statin-<br/>eligible</b>        | <b>1.0%</b><br>4/406                                        | Ref                          | --                 | <b>1.0%</b><br>(11/1088)                                    | Ref                     |                    |
|                 |                                        | <b>P-value (HR<sub>2004</sub> vs<br/>HR<sub>2013</sub>)</b> |                              | .007               | <b>P-value (HR<sub>2004</sub> vs<br/>HR<sub>2013</sub>)</b> |                         | .132               |

**eTable 3.** Baseline Characteristics of Intermediate Risk Subgroup (FRS 6%-20%)

| <b>Number of Participants</b>        | <b>Total<br/>(n=918)</b> | <b>No Incident<br/>CVD<br/>(n= 882)</b> | <b>Incident CVD<br/>(n= 36)</b> |
|--------------------------------------|--------------------------|-----------------------------------------|---------------------------------|
| Age (mean years +/-SD)               | 54.7 +/- 8.5             | 54.5 +/- 8.5                            | 57.7 +/- 7.2                    |
| Female, n(%)                         | 312 (34.0)               | 299 (33.9)                              | 13 (36.1)                       |
| Traditional Risk Factors, n(%)       |                          |                                         |                                 |
| Hypertension                         | 377 (41.1)               | 361 (40.9)                              | 16 (44.4)                       |
| Smoking                              | 151 (16.4)               | 142 (16.1)                              | 9 (25.0)                        |
| Diabetes Mellitus                    | 62 (6.8)                 | 60 (6.8)                                | 2 (5.6)                         |
| Family History of Premature CHD      | 185 (25.1)               | 176 (24.9)                              | 9 (30.0)                        |
| Lipids                               |                          |                                         |                                 |
| Total Cholesterol (mean mg/dl +/-SD) | 210 +/- 34               | 210 +/- 34                              | 205 +/-28                       |
| LDL (mean mg/dl +/-SD)               | 133 +/- 31               | 134 +/- 31                              | 130 +/-26                       |
| HDL (mean mg/dl +/-SD)               | 47 +/- 13                | 47 +/- 14                               | 47 +/-13                        |
| Anti-hypertensive medication (%)     | 195 (21.2)               | 187 (21.2)                              | 8 (22.2)                        |
| Framingham Risk Score (mean+/-SD)    | 10.2 +/- 3.4             | 10.1 +/-3.4                             | 12.0 +/-3.8                     |
| CAC score (mean+/-SD)                | 147 +/- 399              | 137 +/- 387                             | 407 +/-571                      |
| CAC score (median, quartiles)        | 9.8 (0-113)              | 7.6 (0-96.2)                            | 230 (55-473)                    |
| CAC > 0 (%)                          | 569 (62.0)               | 537 (60.9)                              | 32 (88.9)                       |

**eTable 4.** Identification of Incident CVD by Statin Eligibility With CAC=0 Becoming Ineligible for Statin Criterion

|                     | Endpoint                               | Incident CVD                                                |                              |                    | Incident CVD CAC=0 Becomes Statin Ineligible                |                               |                    |
|---------------------|----------------------------------------|-------------------------------------------------------------|------------------------------|--------------------|-------------------------------------------------------------|-------------------------------|--------------------|
|                     | <b>N events/<br/>Sample<br/>Size</b>   | 74/2435 (3.0%)                                              |                              |                    | 74/2435 (3.0%)                                              |                               |                    |
|                     | <b>Median<br/>Years F/up<br/>(IQR)</b> | 9.4 yrs (8.1-10.1)                                          |                              |                    | 9.4 yrs (8.1-10.1)                                          |                               |                    |
|                     |                                        | <b>N events/<br/>Sample Size</b>                            | <b>HR<br/>(95% CI)</b>       | <b>P<br/>value</b> | <b>N events/<br/>Sample<br/>Size</b>                        | <b>HR<br/>(95% CI)</b>        | <b>P<br/>value</b> |
| <b>2004 ATP</b>     | <b>Statin-<br/>eligible</b>            | <b>6.9%</b><br>(24/348)                                     | <b>3.1</b><br>(1.9-5.0)      | <.001              | <b>9.2%</b><br>(22/238)                                     | <b>4.3</b><br>(2.6-7.0)       | <.001              |
|                     | <b>Not Statin-<br/>eligible</b>        | <b>2.4%</b><br>(50/2087)                                    | Ref                          | --                 | <b>2.4%</b><br>(52/2197)                                    |                               |                    |
| <b>2013<br/>ACC</b> | <b>Statin-<br/>eligible</b>            | <b>6.3%</b><br>59/941                                       | <b>6.8</b><br>(3.8-<br>11.9) | <.001              | <b>8.5%</b><br>(54/635)                                     | <b>8.4</b><br>(.5.0-<br>13.9) | .006               |
|                     | <b>Not Statin-<br/>eligible</b>        | <b>1.0%</b><br>15/1494                                      | Ref                          | --                 | <b>1.1%</b><br>(20/1800)                                    |                               |                    |
|                     |                                        | <b>P-value (HR<sub>2004</sub> vs<br/>HR<sub>2013</sub>)</b> |                              | <.001              | <b>P-value (HR<sub>2004</sub> vs<br/>HR<sub>2013</sub>)</b> |                               | .001               |

**eTable 5.** Identification of Incident CVD by Statin Eligibility (Excluding Participants With Incomplete History Regarding Family History of Premature CHD): Observed Event Rates and Hazards Ratios Stratified by Statin Allocation Recommendation According to 2004 ATP III Versus 2013 ACC/AHA Guidelines

|                 | Endpoint                           | Incident CVD                                            |                          |                |
|-----------------|------------------------------------|---------------------------------------------------------|--------------------------|----------------|
|                 | <b>N events/<br/>Sample Size</b>   | 63/1984 (3.2%)                                          |                          |                |
|                 | <b>Median<br/>Years F/up (IQR)</b> | 9.4 yrs (8.2-10.2)                                      |                          |                |
|                 |                                    | <b>N events/<br/>Sample Size</b>                        | <b>HR<br/>(95% CI)</b>   | <b>P value</b> |
| <b>2004 ATP</b> | <b>Statin-eligible</b>             | <b>6.9%</b><br>(24/348)                                 | <b>3.1</b><br>(1.9-5.2)  | <.001          |
|                 | <b>Not Statin-eligible</b>         | <b>2.4%</b><br>(39/1636)                                | Ref                      | --             |
| <b>2013ACC</b>  | <b>Statin-eligible</b>             | <b>6.4%</b><br>52/811                                   | <b>7.5</b><br>(3.9-14.4) | <.001          |
|                 | <b>Not Statin-eligible</b>         | <b>0.9%</b><br>11/1173                                  | Ref                      | --             |
|                 |                                    | <b>P-value (HR<sub>2004</sub> vs HR<sub>2013</sub>)</b> |                          | .009           |
